# Supplementary material for: A pharmacy led program to review anti-psychotic prescribing for people with dementia
Source: Springer Nature journal article supplement (doi:10.1186/1471-244x-12-155), 2012-09-25
Supplement: 12888_2012_1032_MOESM1_ESM.pdf [file 12888_2012_1032_MOESM1_ESM.pdf]

Number of people on the dementia register (n=1051)

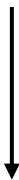

Number of people on the dementia register receiving low-dose anti-psychotics (n=161)

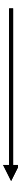

Number of people on the dementia register receiving low-dose anti-psychotics initiated by primary care (n=70)

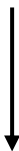

Number of people in whom the anti-psychotic was withdrawn or the dosage reduced (n=43)
